# Supplementary figures and images for: Fine Mapping of Five Grain Size QTLs Which Affect Grain Yield and Quality in Rice
Source: MDPI journal article supplement (doi:10.3390/ijms25084149), 2024-04-09

**A**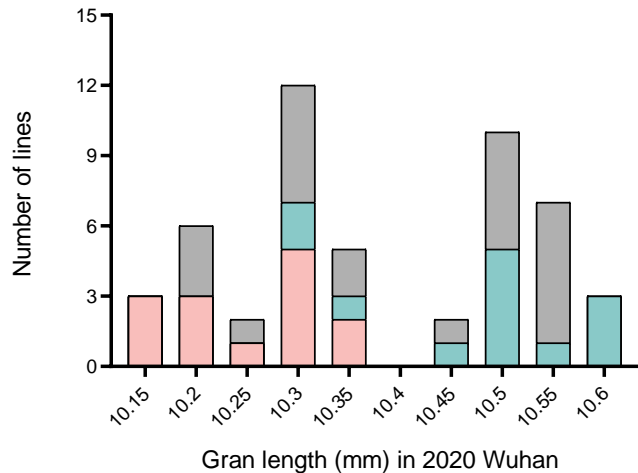**B**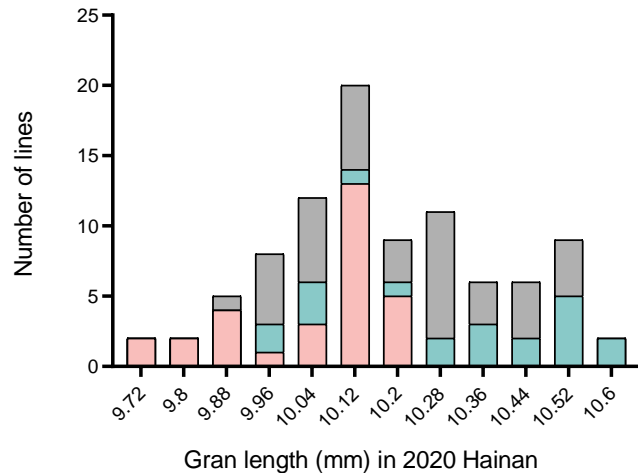

Homozygous W240

Homozygous GZ63-4S

Heterozygous

Supplement: s1 [file s1]

**A**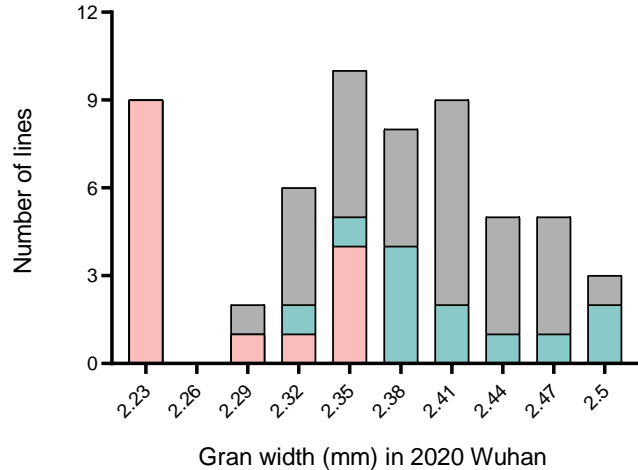**B**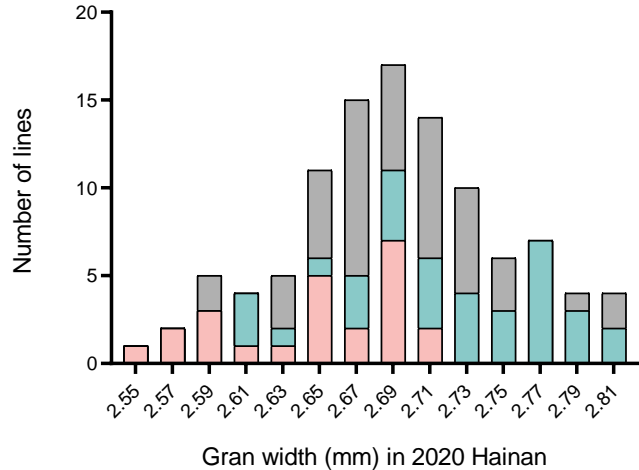

Homozygous W240

Homozygous GZ63-4S

Heterozygous

Supplement: s1 [file s1]

**A**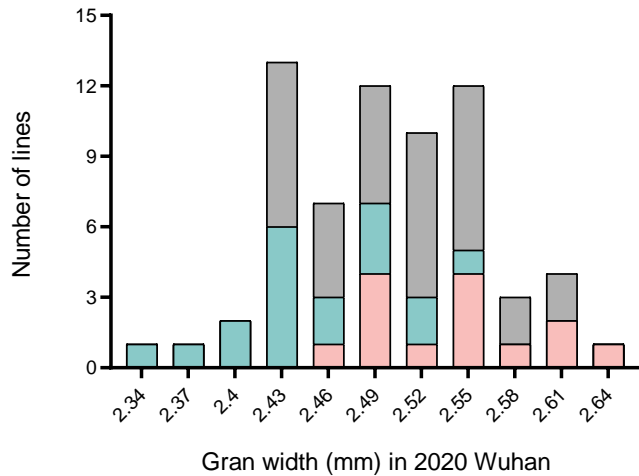**B**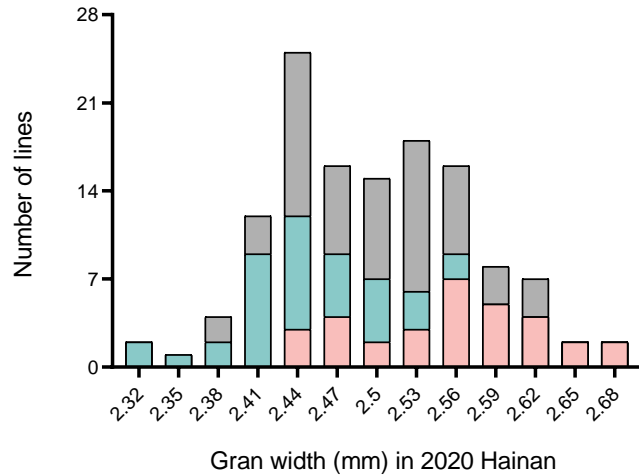

Homozygous W240

Homozygous GZ63-4S

Heterozygous

Supplement: s1 [file s1]

**A**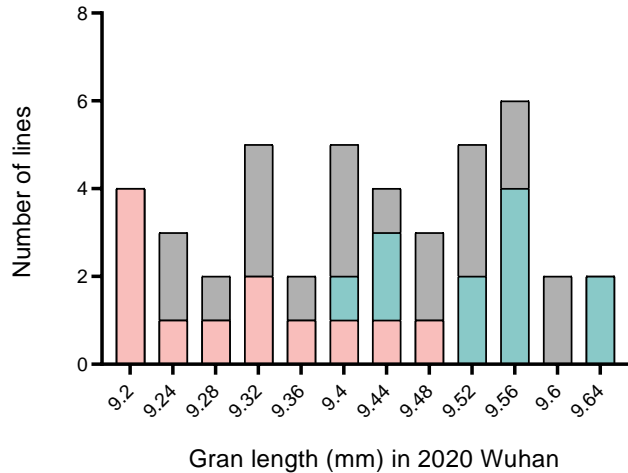**B**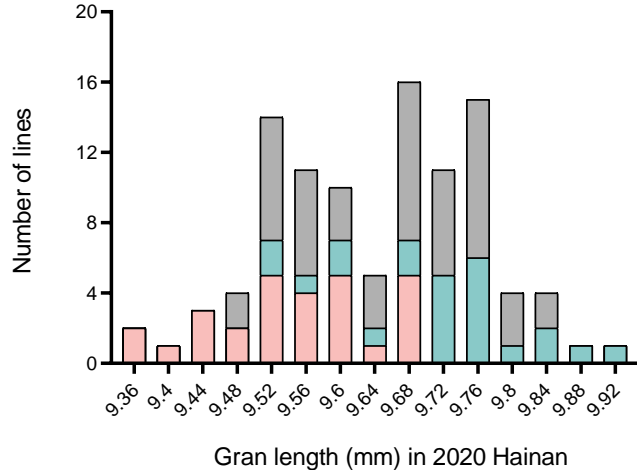

Homozygous W240

Homozygous GZ63-4S

Heterozygous

Supplement: s1 [file s1]

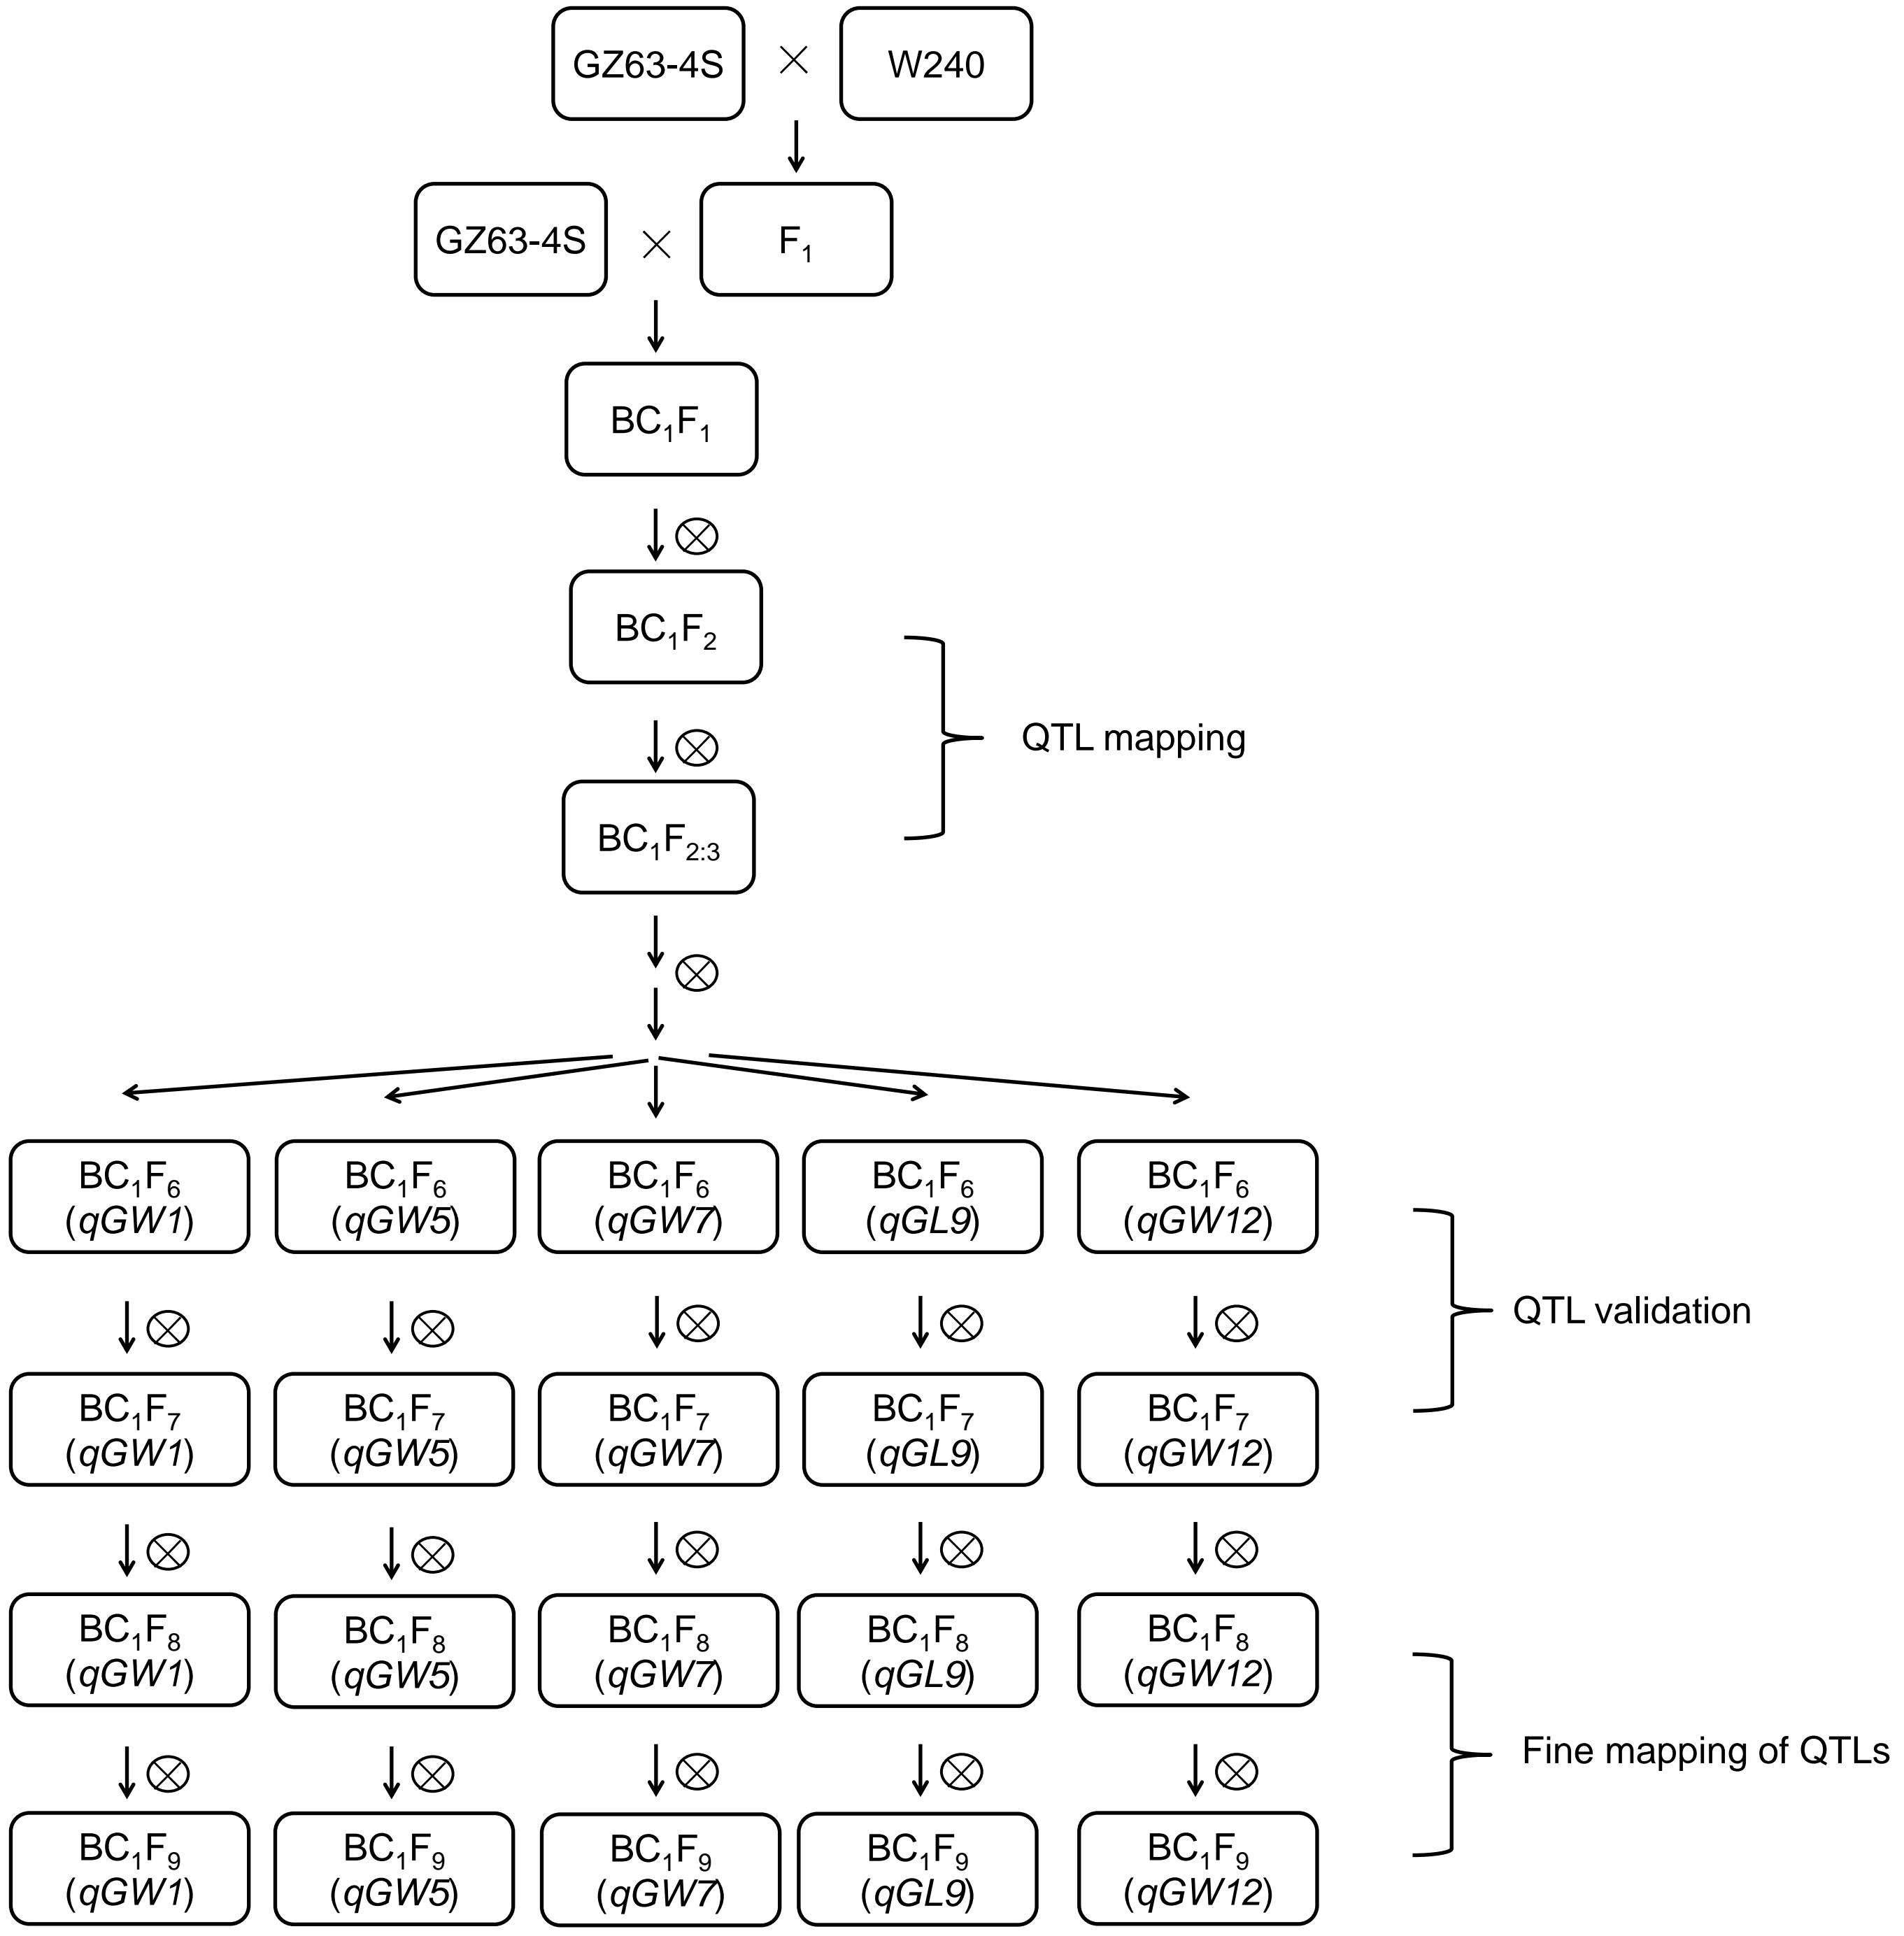

Supplement: s1 [file s1]

**A**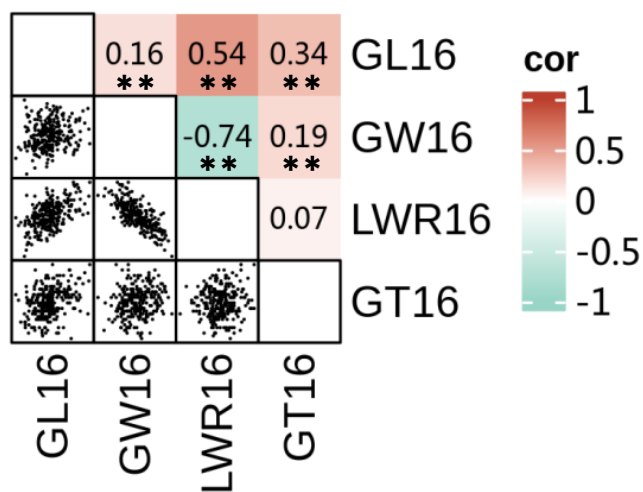**B**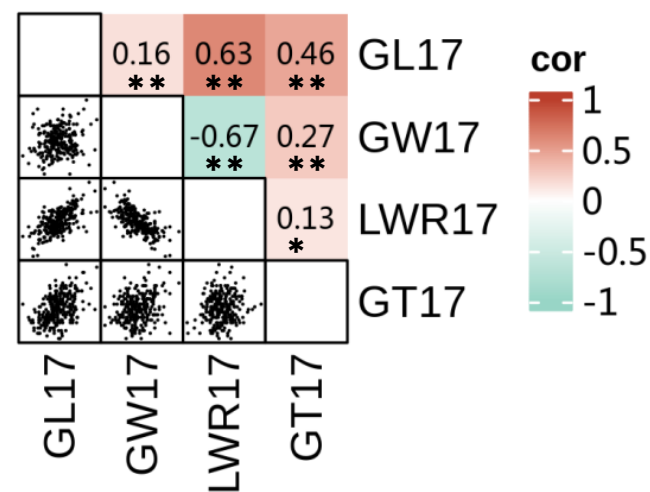**C**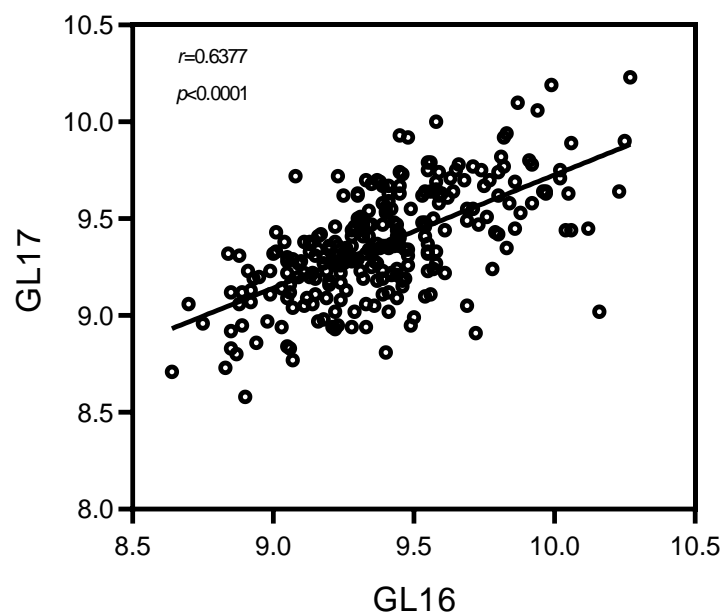**D**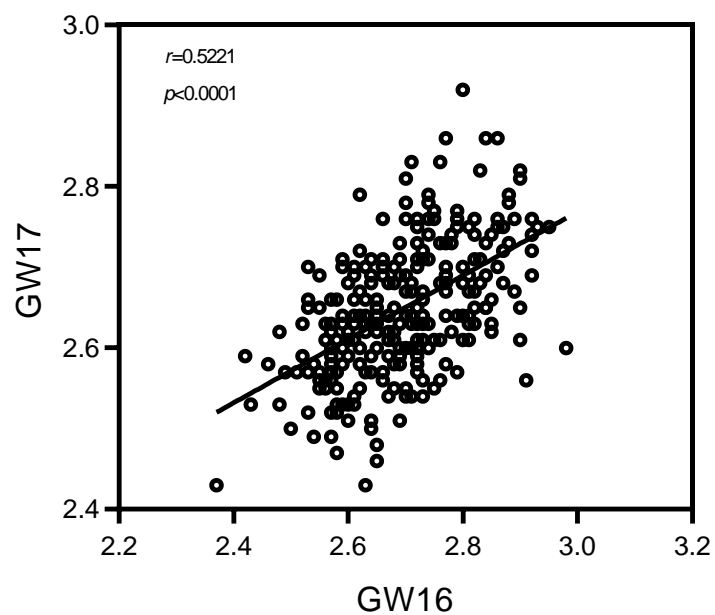**E**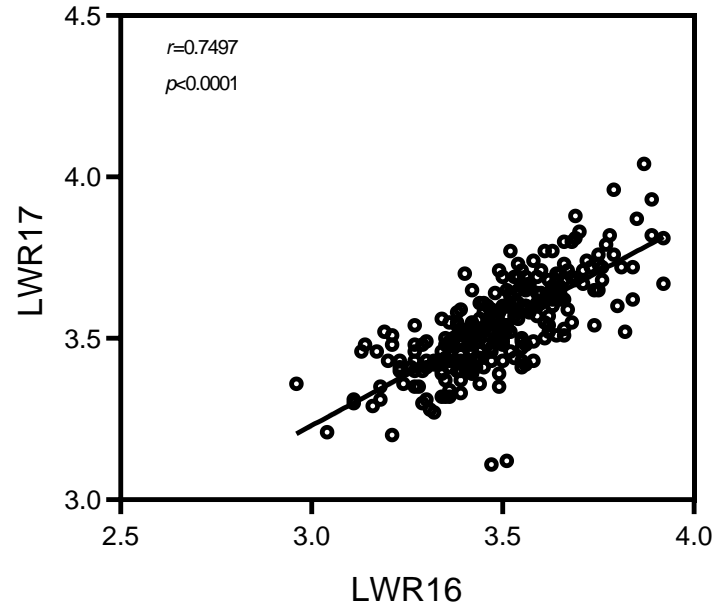**F**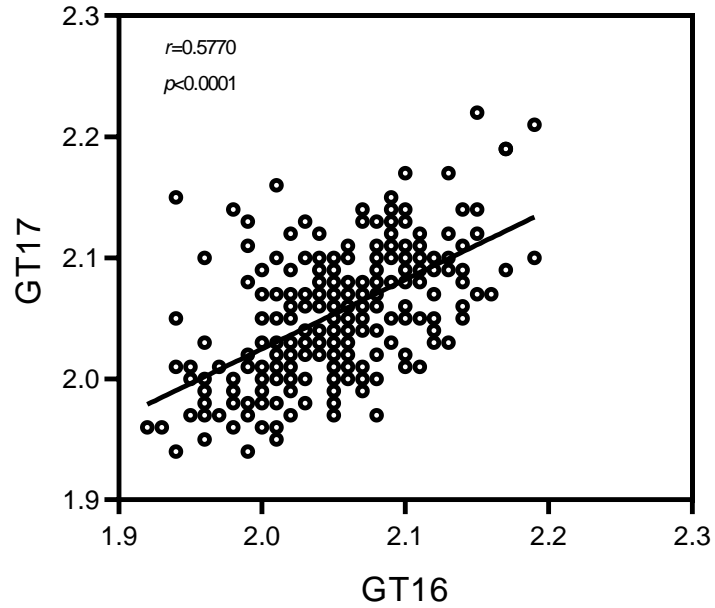

Supplement: s1 [file s1]

**A**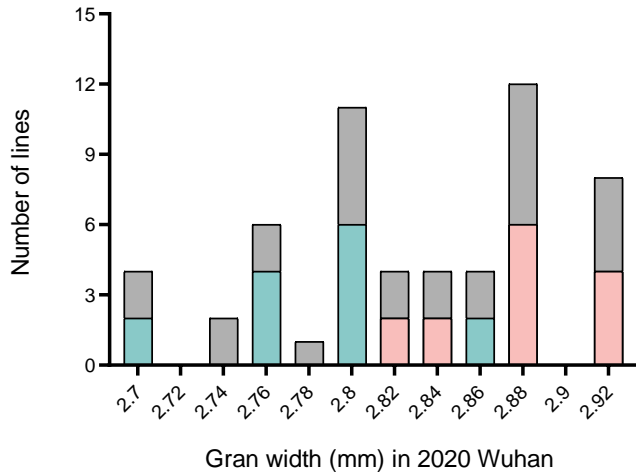**B**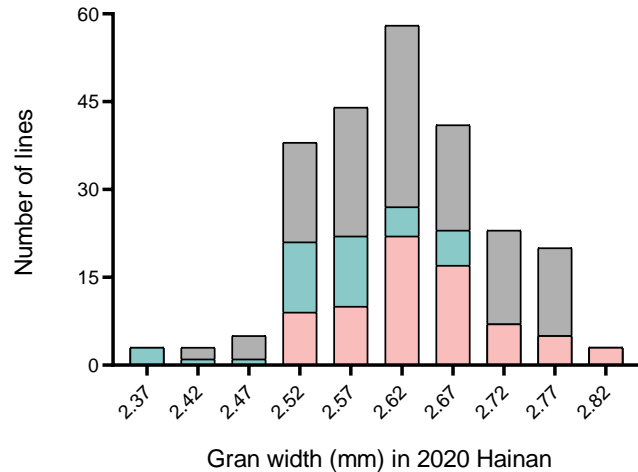

Homozygous W240

Homozygous GZ63-4S

Heterozygous

Supplement: s1 [file s1]
